# Supplementary material for: pH-Sensitive nanogels based on the electrostatic self-assembly of radionuclide131I labeled albumin and carboxymethyl cellulose for synergistic combined chemo-radioisotope therapy of cancer
Source: Royal Society of Chemistry journal article supplement (doi:10.1039/c8tb01295d), 2018-01-01
Supplement: c8tb01295d1.pdf [file c8tb01295d1.pdf]

### Supplementary information

#### **pH-sensitive nanogels based on the electrostatic self-assembly of radionuclide <sup>131</sup>I labeled albumin and carboxymethyl cellulose for synergistic combined chemo-radioisotope therapy of cancer**

Kefeng Liu<sup>a</sup>, Dan Zheng<sup>a</sup>, Jingyang Zhao<sup>a</sup>, Yinghua Tao<sup>a</sup>, Yingsa Wang<sup>a</sup>, Jing Hea,  
Jiandu Lei<sup>a,\*</sup>, and Xingjun Xi<sup>b\*</sup>

<sup>a</sup> Beijing Key Laboratory of Lignocellulosic Chemistry, Beijing Forestry University,  
Beijing 100083, P. R. China.

<sup>b</sup> Institute of Food and Agricultural Standardization, China National Institute of  
Standardization, Beijing 100191, China

**Table S1.** Characterization of the BSA/CMC nanogels with different BSA to CMC mass ratios, pH, heating temperature and time

| No. | BSA/CMC (w/w) | Time (min) | pH  | Temperature (°C) | Size (nm)     | ζ-potential (mV) | PDI  |
|-----|---------------|------------|-----|------------------|---------------|------------------|------|
| 1   | 6:1           | 60         | 5.0 | 70               | 107.05 ± 3.46 | -36.74 ± 0.94    | 0.29 |
| 2   | 4:1           | 60         | 5.0 | 70               | 90.12 ± 2.38  | -38.66 ± 1.02    | 0.13 |
| 3   | 2:1           | 60         | 5.0 | 70               | 98.64 ± 1.97  | -41.49 ± 0.98    | 0.24 |
| 4   | 1:1           | 60         | 5.0 | 70               | 124.05 ± 4.25 | -35.25 ± 0.86    | 0.23 |
| 5   | 4:1           | 30         | 5.0 | 70               | 117.05 ± 2.44 | -33.76 ± 1.56    | 0.27 |
| 6   | 4:1           | 45         | 5.0 | 70               | 121.05 ± 3.46 | -36.94 ± 2.05    | 0.34 |
| 7   | 4:1           | 60         | 5.0 | 70               | 92.45 ± 2.18  | -37.26 ± 1.14    | 0.19 |
| 8   | 4:1           | 75         | 5.0 | 70               | 99.05 ± 3.46  | -32.62 ± 1.98    | 0.25 |
| 9   | 4:1           | 60         | 3.0 | 70               | 187.46 ± 5.06 | -34.02 ± 2.64    | 0.34 |
| 10  | 4:1           | 60         | 4.0 | 70               | 164.92 ± 3.81 | -36.24 ± 1.69    | 0.26 |
| 11  | 4:1           | 60         | 5.0 | 70               | 95.26 ± 2.11  | -38.21 ± 1.76    | 0.21 |
| 12  | 4:1           | 60         | 6.0 | 70               | 99.06 ± 1.87  | -34.07 ± 0.87    | 0.28 |
| 13  | 4:1           | 60         | 7.0 | 70               | 95.34 ± 3.37  | -35.29 ± 1.27    | 0.19 |
| 14  | 4:1           | 60         | 8.0 | 70               | 108.59 ± 2.64 | -36.92 ± 1.75    | 0.34 |
| 15  | 4:1           | 60         | 5.0 | 25               | 176.02 ± 2.47 | -31.63 ± 1.54    | 0.24 |
| 16  | 4:1           | 60         | 5.0 | 40               | 142.54 ± 1.46 | -34.27 ± 1.62    | 0.29 |
| 17  | 4:1           | 60         | 5.0 | 55               | 113.71 ± 1.59 | -29.87 ± 2.02    | 0.32 |
| 18  | 4:1           | 60         | 5.0 | 70               | 89.04 ± 0.86  | -41.23 ± 1.32    | 0.21 |
| 19  | 4:1           | 60         | 5.0 | 85               | 94.02 ± 0.97  | -44.64 ± 2.37    | 0.25 |

**Table S2.** Characterization of nanogels

| Samples     | Size (nm)      | ζ- potential (mV) | EE (%)       | DLC (wt%)    |
|-------------|----------------|-------------------|--------------|--------------|
| BSA/CMC     | 90.12 ± 7.19   | -35.77 ± 2.68     | -            | -            |
| BSA-CMC-CPT | 120.46 ± 10.13 | -39.46 ± 4.52     | 89.42 ± 2.68 | 16.72 ± 2.68 |

**Table S3.** Stability of nanogels in different pH.

| pH  | Size (nm)     | ζ- potential (mV) | PDI  |
|-----|---------------|-------------------|------|
| 3.0 | 129.62 ± 8.19 | -27.67 ± 2.48     | 0.26 |
| 4.0 | 106.46 ± 6.13 | -33.17 ± 4.02     | 0.23 |
| 5.0 | 92.55 ± 5.27  | -38.33 ± 3.29     | 0.21 |
| 6.0 | 104.65 ± 9.22 | -39.22 ± 4.24     | 0.25 |
| 7.0 | 99.12 ± 6.49  | -36.28 ± 3.92     | 0.27 |
| 8.0 | 104.46 ± 7.14 | -31.46 ± 2.87     | 0.31 |
